# Supplementary material for: Melatonin Ameliorates Corticosterone-Mediated Oxidative Stress-Induced Colitis in Sleep-Deprived Mice Involving Gut Microbiota
Source: PubMed Central journal article supplement (PMC8246302; doi:10.1155/2021/9981480), 2021-06-23

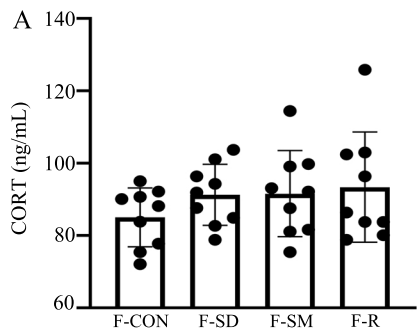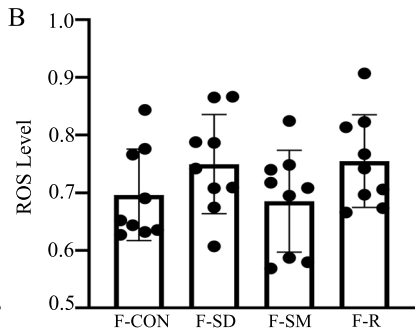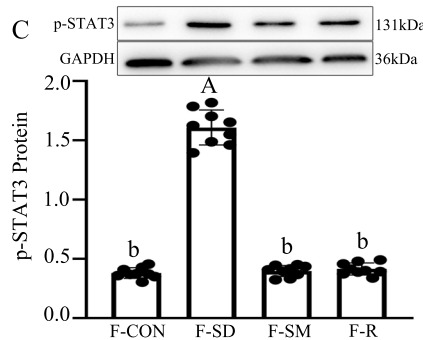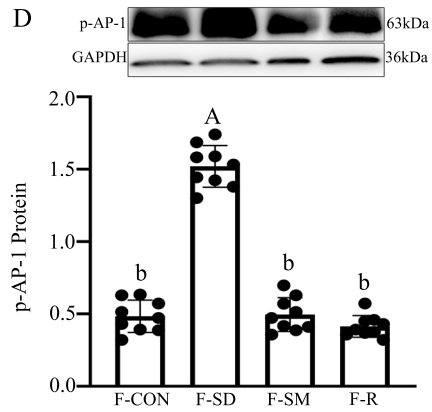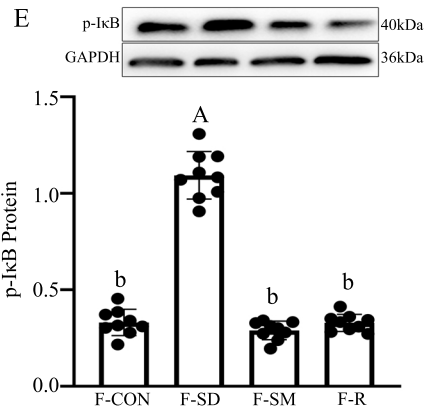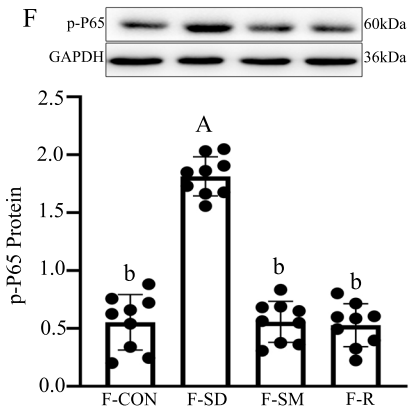

Supplement: 9981480.f3.pdf [file 9981480.f3.pdf]
