# Supplementary material for: Melatonin Ameliorates Corticosterone‐Mediated Oxidative Stress‐Induced Colitis in Sleep‐Deprived Mice Involving Gut Microbiota
Source: Hindawi journal article supplement (doi:10.1155/2021/9981480), 2021-01-01

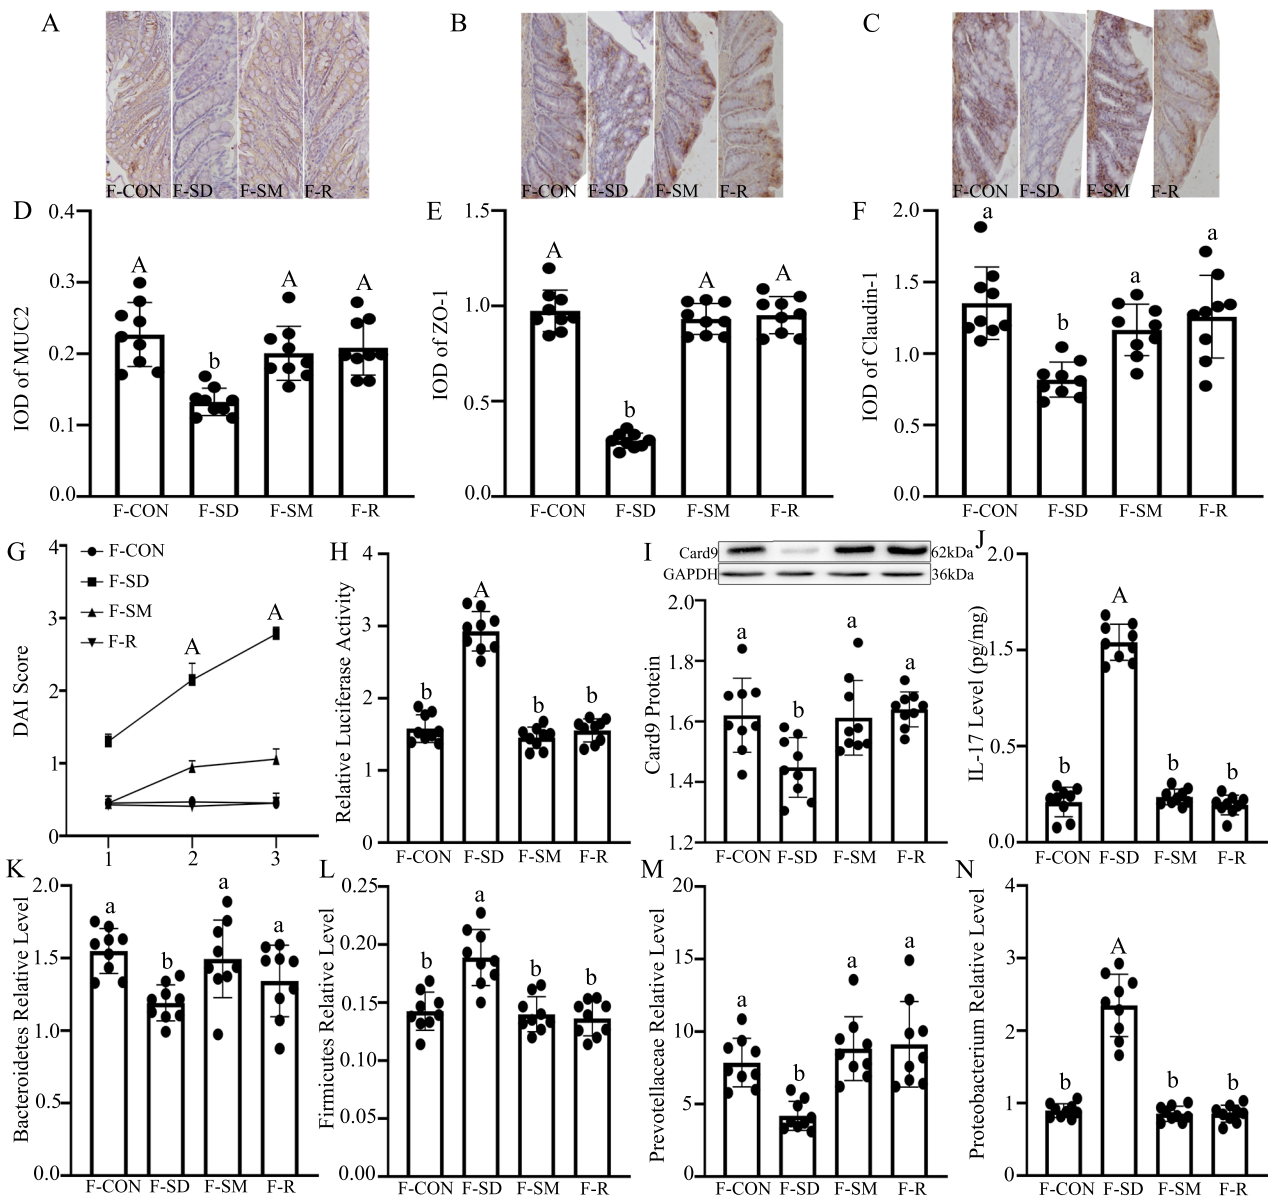

Supplement: f2 [file 9981480.f2.pdf]
